# Supplementary material for: A logic model for pharmaceutical care
Source: PubMed Central journal article supplement — J Health Serv Res Policy. 2018 May 21;23(3):148–57. doi: 10.1177/1355819618768343 (PMC6041739; doi:10.1177/1355819618768343), 2018-05-21
Supplement: Supplemental_material.pdf [file Supplemental_material.pdf]

## Appendix 1

| First author and reference                         | Title                                                                                                                                                                         | Country       |
|----------------------------------------------------|-------------------------------------------------------------------------------------------------------------------------------------------------------------------------------|---------------|
| American Pharmacists Association (1)               | Consortium recommendations for advancing pharmacists' patient care services and collaborative practice agreements                                                             | USA           |
| American Society of Health-System, Pharmacists (2) | ASHP Statement on the Role of Health-System Pharmacists in Public Health                                                                                                      | USA           |
| Bjorkman (3)                                       | Care ideologies reflected in 4 conceptions of pharmaceutical care                                                                                                             | Sweden        |
| Bluml (4)                                          | Improving outcomes for diverse populations disproportionately affected by diabetes: final results of Project IMPACT: Diabetes                                                 | USA           |
| Bush (5)                                           | The corporatization of community pharmacy: implications for service provision, the public health function, and pharmacy's claims to professional status in the United Kingdom | UK            |
| Cameron (6)                                        | Connecting with assisted living consumers                                                                                                                                     | USA           |
| Chisholm-Burns (7)                                 | US pharmacists' effect as team members on patient care: systematic review and meta-analyses                                                                                   | USA           |
| Council on Credentialing in, Pharmacy (8)          | Scope of contemporary pharmacy practice: roles, responsibilities, and functions of pharmacists and pharmacy technicians                                                       | USA           |
| de Bittner (9)                                     | Report of the 2010-2011 Professional Affairs Committee: Effective partnerships to implement pharmacists' services in team-based, patient-centered healthcare                  | USA           |
| Dobson (10)                                        | Taking the lead: community pharmacists' perception of their role potential within the primary care team                                                                       | Canada        |
| Dolovich (11)                                      | Ontario pharmacists practicing in family health teams and the patient-centered medical home                                                                                   | Canada        |
| Ellitt (12)                                        | Quality patient care and pharmacists' role in its continuity--a systematic review                                                                                             | International |
| Farrell (13)                                       | Working in interprofessional primary health care teams: what do pharmacists do?                                                                                               | Canada        |
| Farris (14)                                        | Pharmacists in public health: It's a good start!                                                                                                                              | USA           |
| Freeman (15)                                       | Does a primary care practice pharmacist improve the timeliness and completion of medication management reviews?                                                               | Australia     |
| Gallagher (16)                                     | Improving the working relationship between doctors and pharmacists: is inter-professional education the answer?                                                               | Ireland       |
| George (17)                                        | The evolving role of the community pharmacist in chronic disease management - a literature review                                                                             | International |
| Gurney (18)                                        | Health care at a crossroad: what will the pharmacists' role be?                                                                                                               | Canada        |
| Jorgenson (19)                                     | Integrating pharmacists into primary care teams: barriers and facilitators                                                                                                    | Canada        |
| Kolodziejak (20)                                   | Integration of a primary healthcare pharmacist                                                                                                                                | Canada        |
| Novak (21)                                         | Reducing unnecessary hospital readmissions: the pharmacist's role in care transitions                                                                                         | USA           |

|                 |                                                                                                                                                            |                       |
|-----------------|------------------------------------------------------------------------------------------------------------------------------------------------------------|-----------------------|
| Patwardhan (22) | The value of pharmacists in health care                                                                                                                    | International         |
| Pottie (23)     | Pharmacist's identity development within multidisciplinary primary health care teams in Ontario; qualitative results from the IMPACT project               | Canada                |
| Raju (24)       | The expanding role of Minnesota pharmacists in primary care                                                                                                | USA                   |
| Ross (25)       | Pharmacists as mid-level practitioners/providers                                                                                                           | USA                   |
| Schoenhaus (26) | 2013 Prescott lecture: embracing our roles as medication navigators                                                                                        | USA                   |
| Sinnett (27)    | You have the tools . . . now create that PPMI model!                                                                                                       | USA                   |
| Sminkey (28)    | Pharmacists on the team: tapping invaluable expertise to foster the triple aim                                                                             | USA                   |
| Smith (29)      | Consumer, physician, and payer perspectives on primary care medication management services with a shared resource pharmacists network                      | USA                   |
| Smith (30)      | Pharmacists belong in accountable care organizations and integrated care teams                                                                             | USA and International |
| Tan (31)        | Pharmacist services provided in general practice clinics: a systematic review and meta-analysis                                                            | International         |
| Tan (32)        | Pharmacist consultations in general practice clinics: the Pharmacists in Practice Study (PIPS)                                                             | Australia             |
| Tarn (33)       | Older patient, physician and pharmacist perspectives about community pharmacists' roles                                                                    | USA                   |
| Traynor (34)    | Pharmacist fits on high-intensity transitional care team                                                                                                   | USA                   |
| Trygstad (35)   | The role of the pharmacist in CCNC                                                                                                                         | USA                   |
| Twigg (36)      | An audit of prescribing for type 2 diabetes in primary care: optimising the role of the community pharmacist in the primary healthcare team                | USA                   |
| Wong (37)       | Patient self-management and pharmacist-led patient self-management in Hong Kong: a focus group study from different healthcare professionals' perspectives | Hong Kong             |

#### References included in the literature review

1. American Pharmacists Association F, American Pharmacists A. Consortium recommendations for advancing pharmacists' patient care services and collaborative practice agreements. *J Am Pharm Assoc* (2003). 2013;53(2):e132-41.
2. American Society of Health-System P. ASHP Statement on the Role of Health-System Pharmacists in Public Health. *Am J Health-Syst Pharm*. 2008;65(5):462-7.
3. Bjorkman IK, Bernsten CB, Sanner MA. Care ideologies reflected in 4 conceptions of pharmaceutical care. *Res Social Adm Pharm*. 2008;4(4):332-42.
4. Bluml BM, Watson LL, Skelton JB, Manolakis PG, Brock KA. Improving outcomes for diverse populations disproportionately affected by diabetes: final results of Project IMPACT: Diabetes. *J Am Pharm Assoc* (2003). 2014;54(5):477-85.
5. Bush J, Langley CA, Wilson KA. The corporatization of community pharmacy: implications for service provision, the public health function, and pharmacy's claims to professional status in the United Kingdom. *Res Social Adm Pharm*. 2009;5(4):305-18.

6. Cameron KA, Pinkowitz J. Connecting with assisted living consumers. *Consult Pharm*. 2009;24(1):16-8, 21-8.
7. Chisholm-Burns MA, Kim Lee J, Spivey CA, Slack M, Herrier RN, Hall-Lipsy E, et al. US pharmacists' effect as team members on patient care: systematic review and meta-analyses. *Med Care*. 2010;48(10):923-33.
8. Council on Credentialing in P, Albanese NP, Rouse MJ. Scope of contemporary pharmacy practice: roles, responsibilities, and functions of pharmacists and pharmacy technicians. *J Am Pharm Assoc* (2003). 2010;50(2):e35-69.
9. de Bittner MR, Adams AJ, Burns AL, Ha C, Hilaire ML, Letendre DE, et al. Report of the 2010-2011 Professional Affairs Committee: Effective partnerships to implement pharmacists' services in team-based, patient-centered healthcare. *Am J Pharm Educ*. 2011;75(10):S11.
10. Dobson RT, Taylor JG, Henry CJ, Lachaine J, Zello GA, Keegan DL, et al. Taking the lead: community pharmacists' perception of their role potential within the primary care team. *Res Social Adm Pharm*. 2009;5(4):327-36.
11. Dolovich L. Ontario pharmacists practicing in family health teams and the patient-centered medical home. *Ann Pharmacother*. 2012;46(4):S33-9.
12. Ellitt GR, Brien JA, Aslani P, Chen TF. Quality patient care and pharmacists' role in its continuity--a systematic review. *Ann Pharmacother*. 2009;43(4):677-91.
13. Farrell B, Ward N, Dore N, Russell G, Geneau R, Evans S. Working in interprofessional primary health care teams: what do pharmacists do? *Res Social Adm Pharm*. 2013;9(3):288-301.
14. Farris KB, Johnson KA. Pharmacists in public health: It's a good start! *J Am Pharm Assoc* (2003). 2010;50(2):128-30.
15. Freeman C, Cottrell WN, Kyle G, Williams I, Nissen L. Does a primary care practice pharmacist improve the timeliness and completion of medication management reviews? *Int J Pharm Pract*. 2012;20(6):395-401.
16. Gallagher RM, Gallagher HC. Improving the working relationship between doctors and pharmacists: is inter-professional education the answer? *Adv Health Sci Educ Theory Pract*. 2012;17(2):247-57.
17. George PP, Molina JA, Cheah J, Chan SC, Lim BP. The evolving role of the community pharmacist in chronic disease management - a literature review. *Ann Acad Med Singapore*. 2010;39(11):861-7.
18. Gurney MK. Health care at a crossroad: what will the pharmacists' role be? *Res Social Adm Pharm*. 2009;5(4):302-4.
19. Jorgenson D, Laubscher T, Lyons B, Palmer R. Integrating pharmacists into primary care teams: barriers and facilitators. *Int J Pharm Pract*. 2014;22(4):292-9.
20. Kolodziejak L, Remillard A, Neubauer S. Integration of a primary healthcare pharmacist. *J Interprof Care*. 2010;24(3):274-84.
21. Novak CJ, Hastanan S, Moradi M, Terry DF. Reducing unnecessary hospital readmissions: the pharmacist's role in care transitions. *Consult Pharm*. 2012;27(3):174-9.
22. Patwardhan A, Duncan I, Murphy P, Pegus C. The value of pharmacists in health care. *Popul Health Manag*. 2012;15(3):157-62.
23. Pottie K, Haydt S, Farrell B, Kennie N, Sellors C, Martin C, et al. Pharmacist's identity development within multidisciplinary primary health care teams in Ontario; qualitative results from the IMPACT project. *Res Social Adm Pharm*. 2009;5(4):319-26.
24. Raju A, Sorge LA, Lounsbery J, Sorensen TD. The expanding role of Minnesota pharmacists in primary care. *Minn Med*. 2011;94(10):49-51.
25. Ross LA. Pharmacists as mid-level practitioners/providers. *Ann Pharmacother*. 2011;45(6):810-2.
26. Schoenhaus R. 2013 Prescott lecture: embracing our roles as medication navigators. *J Am Pharm Assoc* (2003). 2013;53(4):362-4.

27. Sinnett MJ. You have the tools . . . now create that PPMI model! *J Pharm Pract.* 2013;26(2):158-9.
28. Sminkey PV. Pharmacists on the team: tapping invaluable expertise to foster the triple aim. *Prof Case Manag.* 2014;19(3):148-50.
29. Smith M, Cannon-Breland ML, Spiggle S. Consumer, physician, and payer perspectives on primary care medication management services with a shared resource pharmacists network. *Res Social Adm Pharm.* 2014;10(3):539-53.
30. Smith M, Bates DW, Bodenheimer TS. Pharmacists belong in accountable care organizations and integrated care teams. *Health Aff (Millwood).* 2013;32(11):1963-70.
31. Tan EC, Stewart K, Elliott RA, George J. Pharmacist services provided in general practice clinics: a systematic review and meta-analysis. *Res Social Adm Pharm.* 2014;10(4):608-22.
32. Tan EC, Stewart K, Elliott RA, George J. Pharmacist consultations in general practice clinics: the Pharmacists in Practice Study (PIPS). *Res Social Adm Pharm.* 2014;10(4):623-32.
33. Tarn DM, Paterniti DA, Wenger NS, Williams BR, Chewing BA. Older patient, physician and pharmacist perspectives about community pharmacists' roles. *Int J Pharm Pract.* 2012;20(5):285-93.
34. Traynor K. Pharmacist fits on high-intensity transitional care team. *Am J Health-Syst Pharm.* 2014;71(13):1066-8.
35. Trygstad T. The role of the pharmacist in CCNC. *N C Med J.* 2009;70(3):274-6.
36. Twigg MJ, Desborough JA, Bhattacharya D, Wright DJ. An audit of prescribing for type 2 diabetes in primary care: optimising the role of the community pharmacist in the primary healthcare team. *Prim Health Care Res Dev.* 2013;14(3):315-9.
37. Wong FY, Chan FW, You JH, Wong EL, Yeoh EK. Patient self-management and pharmacist-led patient self-management in Hong Kong: a focus group study from different healthcare professionals' perspectives. *BMC Health Serv Res.* 2011;11:121.

## Appendix 2

### Topic list for the first round of interviews with stakeholders to discuss the identified elements of pharmaceutical care

1. **Please could you introduce yourself and tell us a bit about your function within your organization?**
2. **Via literature search, we identified several activities that can contribute to improving pharmaceutical care in terms of quality, accessibility, affordability, and sustainability. We would like to know your opinion regarding such activities, concretely:**
  - For activities that are already being performed in The Netherlands, do you see room for improvement in the context of the upcoming (patient-centered) pharmaceutical care?
  - For activities that are not yet happening in The Netherlands, do you think they should be implemented?
  - Are there specific requirements that would favor/facilitate the implementation of such activities?
  - Are there specific issues that challenge or make the implementation difficult?
  - a) Activities that contribute to an adequate use of medication by the patient:
    - a. Good medication transfer between 1st and 2nd line (between primary and secondary care)
    - b. Medication therapy management: assessment of medication for appropriateness, efficacy, safety, and adherence to achieve optimal therapy goals
    - c. Assessment of health literacy and education of the patient (e.g. about possible interactions, proper medicine storage)
    - d. Pharmacovigilance
  - b) Activities that help to improve the ways in which the patient experiences pharmaceutical care:
    - a. Shared decision making about pharmacotherapy
    - b. Patient can choose own pharmacy
    - c. Transparency about prices for medication and services

*d.* Results of pharmacist interventions are shared with the public

*c)* Activities that facilitate the patient's access to medicines:

- a.* Medicines are always available in pharmacy
- b.* Individualized medicines are available when needed (i.e. compounding)
- c.* Pharmacy is located close to the patient
- d.* Pharmacy is available outside working hours
- e.* Patients with chronic medicines can pick up medication 24 hours per day
- f.* Medicines are available to patients who cannot come to the pharmacy

*d)* Activities that facilitate a patient's access to pharmaceutical counselling services:

- a.* Increase awareness of pharmacy services among patients and healthcare providers
- b.* Identify which patients will benefit the most from pharmaceutical counselling
- c.* Provide out-of-hours services (e.g. via call center)

*e)* Activities that make pharmaceutical care more affordable for the patient:

- a.* Decrease the costs of medicines and services for patients, e.g. via negotiations between pharmacy providers and health insurers

*f)* Activities that make pharmaceutical care more affordable for government/society:

- a.* Diminish burden on physicians by giving pharmacists a role in disease prevention, e.g. via:
  - i.* Screening/preventive interventions (e.g. weight management, lipid control, hypertension control, osteoporosis prevention, depression, dementia, vaccination, smoking cessation, substance abuse prevention)
  - ii.* Lifestyle interventions (e.g. exercise, diet)

- iii.* Prevention of infectious diseases (e.g. travel-related illnesses)
    - iv.* Patient education (e.g.: AIDS awareness, sexual health support)
    - v.* Immunization services
    - vi.* A needle-exchange programme
  - b.* Diminish burden on physicians by giving pharmacists a role in the management of patient's (chronic) diseases, e.g. via:
    - i.* Assessing a patient's ability to manage his/her disease and self-administer medications, and educate when needed
    - ii.* Monitoring a patient's disease condition and parameters (e.g. asthma, hyperlipidemia, chronic heart failure, diabetes, arthritis, osteoporosis)
  - c.* Reduce unnecessary hospital readmissions, e.g. via:
    - i.* Medication therapy management, assessment and interventions regarding falls risk, home safety, cognition, mental health, nutrition, caregiver needs

*g)* Activities that help to protect the environment:

- a.* Prevent waste
- b.* Ensure good disposal of medicines
- c.* Increase awareness among patients and other health professionals

**3. Can you think of any other activity that would help to improve patient pharmaceutical care?**

**4. How may your organization contribute to the above-mentioned activities?**
